# Supplementary material for: The self-assembly effect in NLO polymers containing isolation chromophores: enhanced NLO coefficient and stability
Source: Royal Society of Chemistry journal article supplement (doi:10.1039/c3nj00048f), 2013-01-01
Supplement: c3nj00048f.pdf [file c3nj00048f.pdf]

## Electronic Supplementary Information:

### The self-assembly effect in NLO polymers containing isolation chromophores: enhanced NLO coefficient and stability

Wenbo Wu,<sup>a</sup> Zhen Xu,<sup>a</sup> Ying Xiong,<sup>\*a</sup> Shaohui Xin,<sup>a</sup> Hongding Tang,<sup>a</sup> Cheng Ye,<sup>b</sup> Guofu Qiu,<sup>c</sup> Jingui Qin,<sup>a</sup> and Zhen Li<sup>\*a</sup>

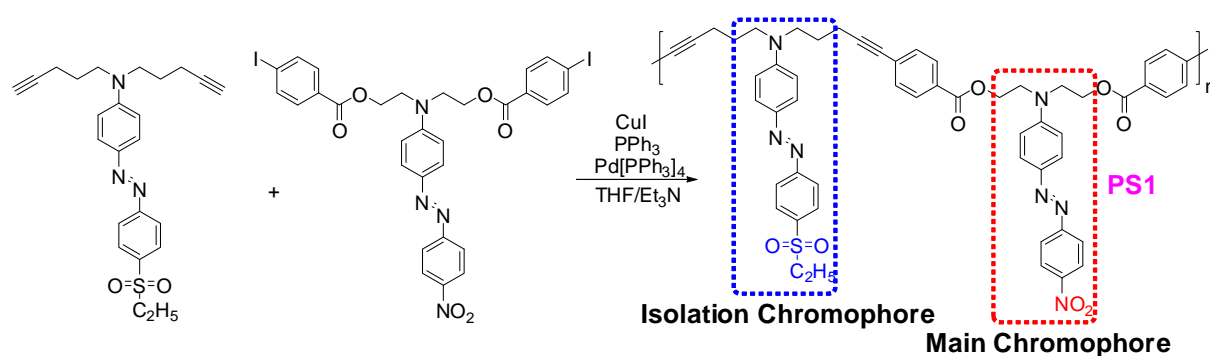

Chart S1 The structure of NLO polymer PS1 containing isolation chromophore.

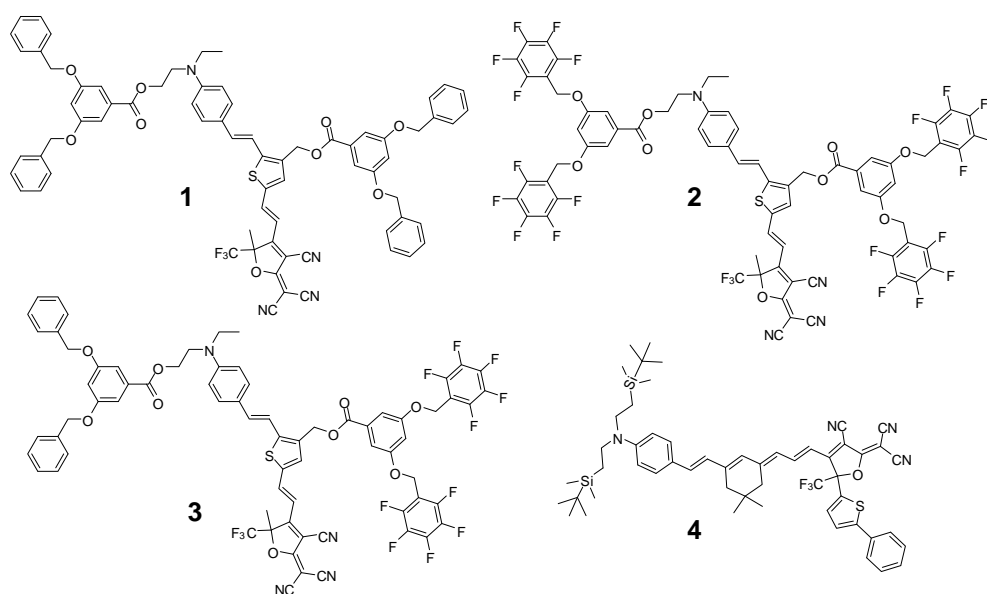

Chart S2 The structure of dendron-substituted NLO chromophores containing perfluoroaromatic rings.

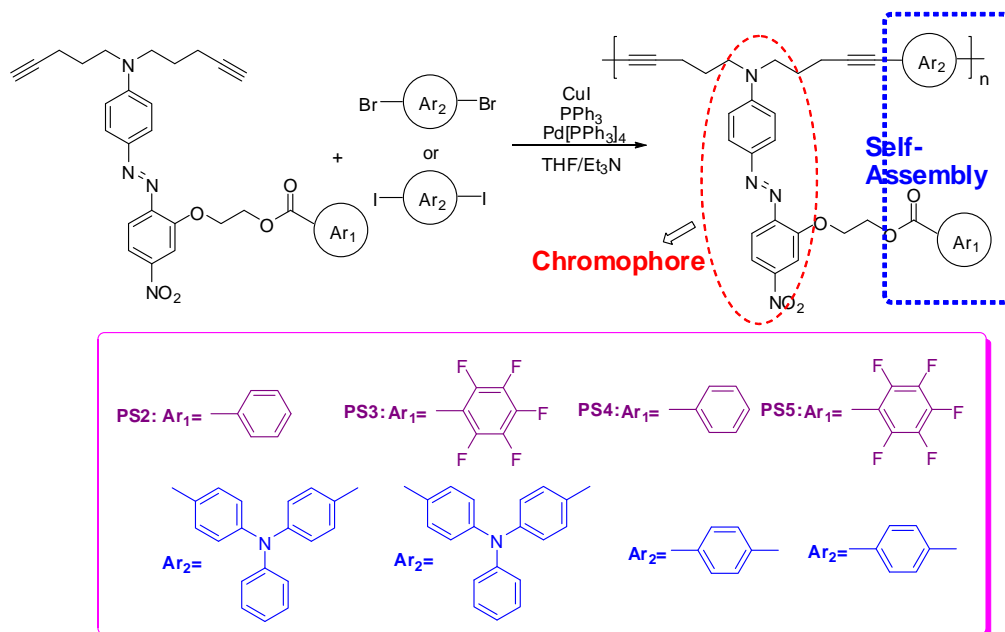

**Chart S3** The structures of NLO polymers **PS2-PS5** with different types of isolation groups.

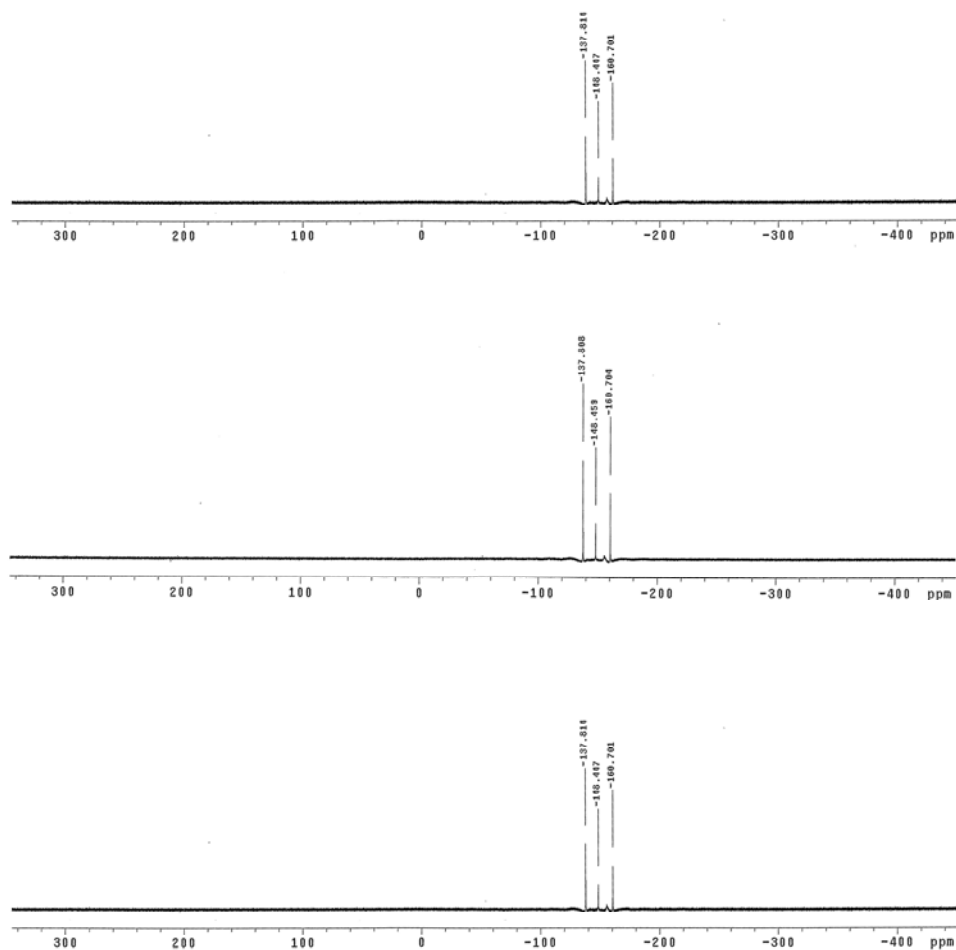

**Fig. S1** The <sup>19</sup>F NMR spectra of **P2** (up), **P3** (middle) and **P4** (down).

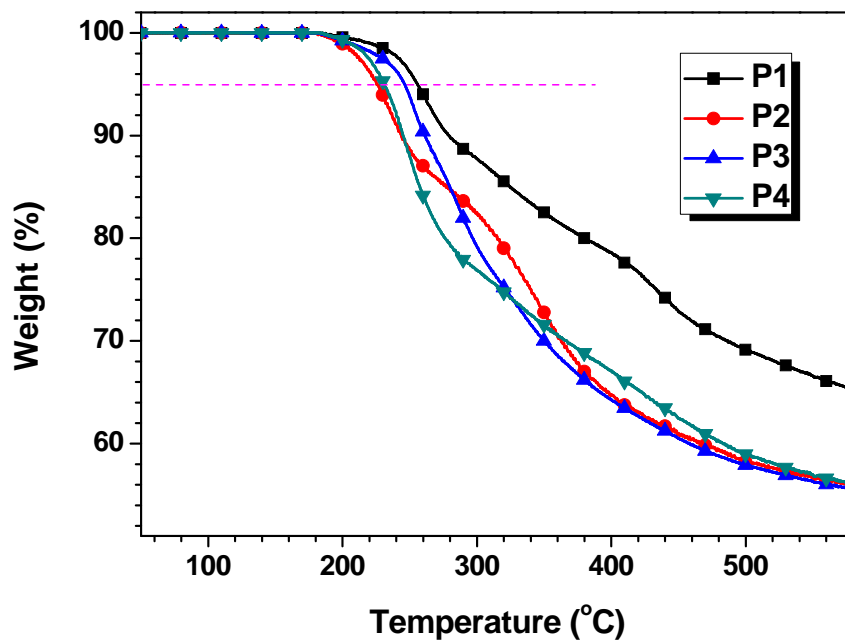

Fig. S2 TGA thermograms of **P1-P4**, measured in nitrogen at a heating rate of 10 °C/min.

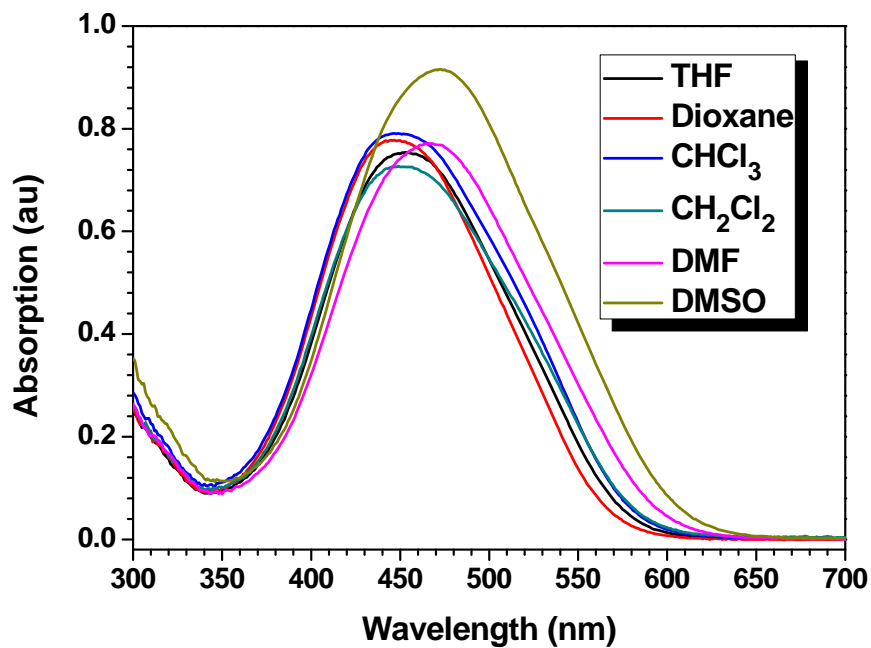

Fig. S3 UV-vis spectra of polymer **P1** in different solvents (0.02 mg/mL).

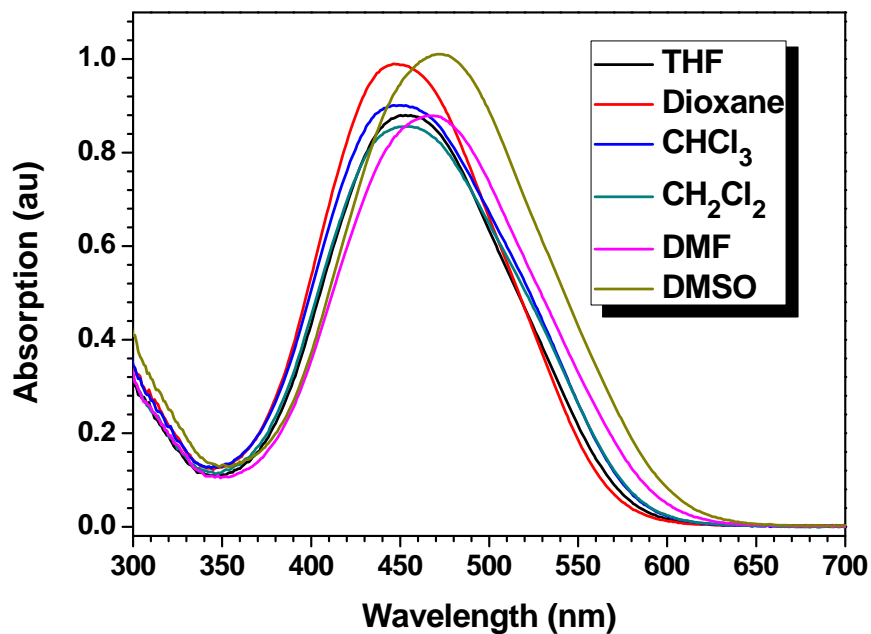

Fig. S4 UV-vis spectra of polymer **P2** in different solvents (0.02 mg/mL).

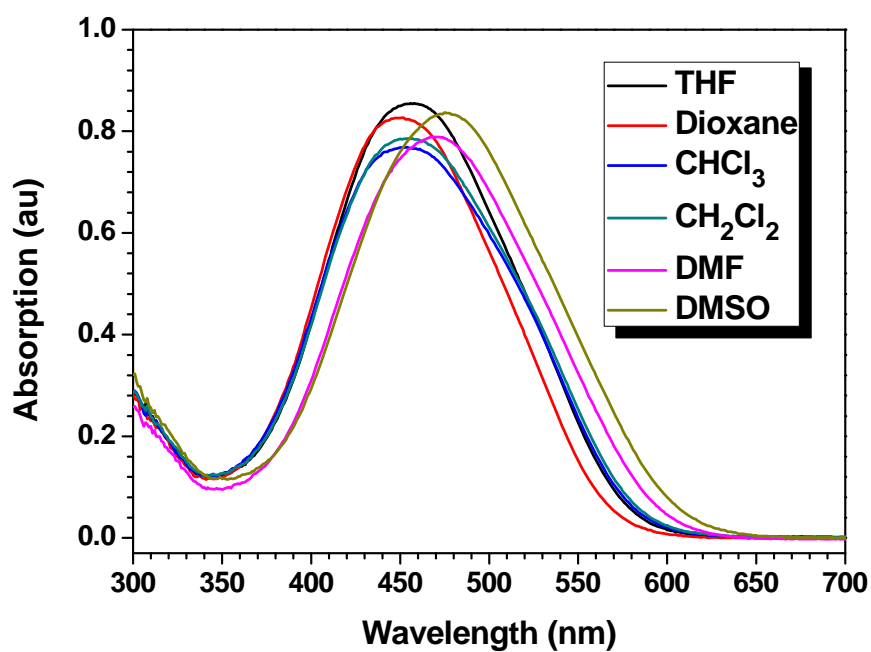

Fig. S5 UV-vis spectra of polymer **P3** in different solvents (0.02 mg/mL).

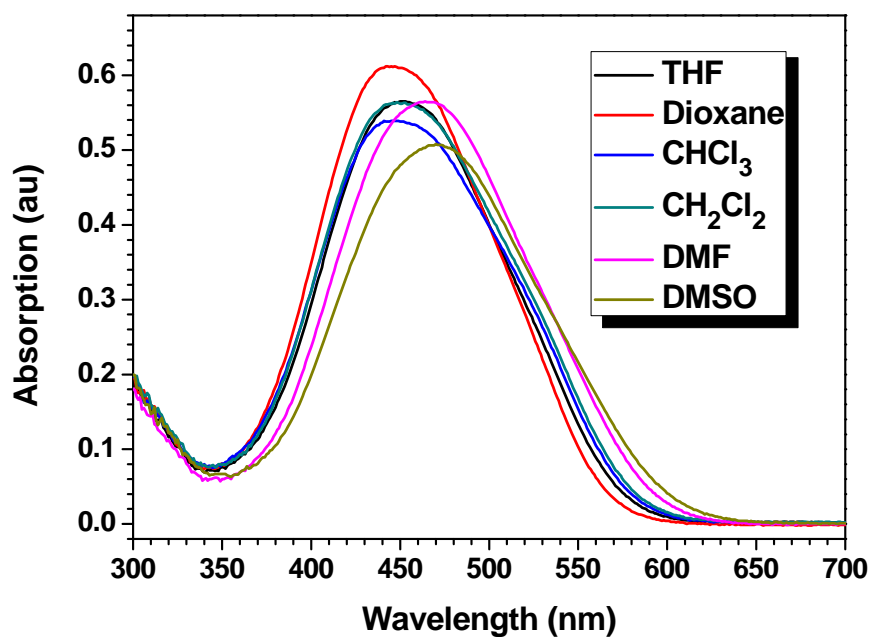

Fig. S6 UV-vis spectra of polymer **P4** in different solvents (0.02 mg/mL).

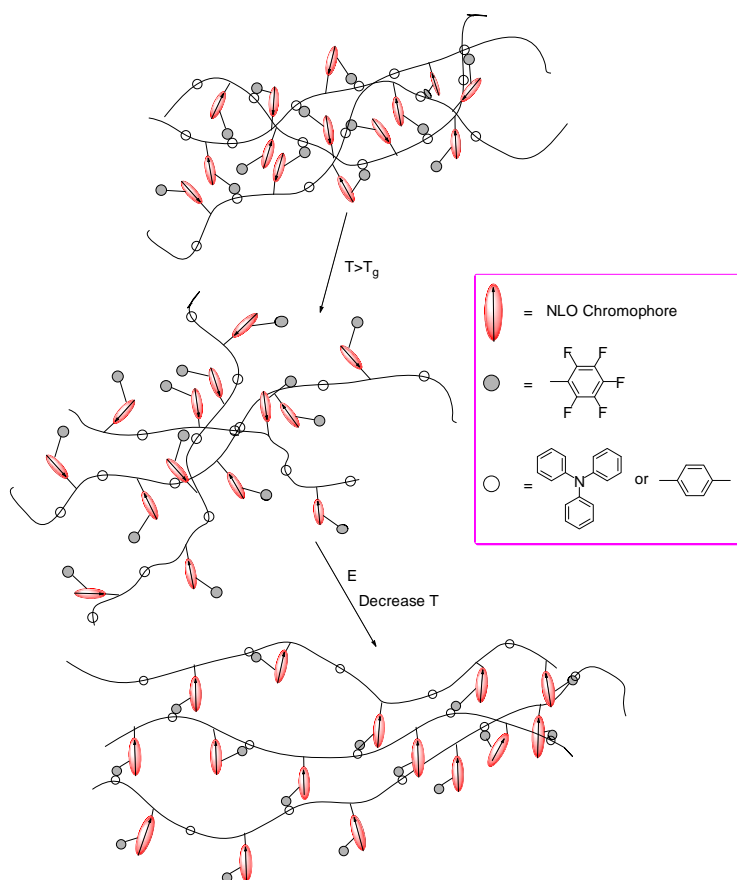

Fig. S7 Graphical illustration of the alignment formation of self-assembled polymers.

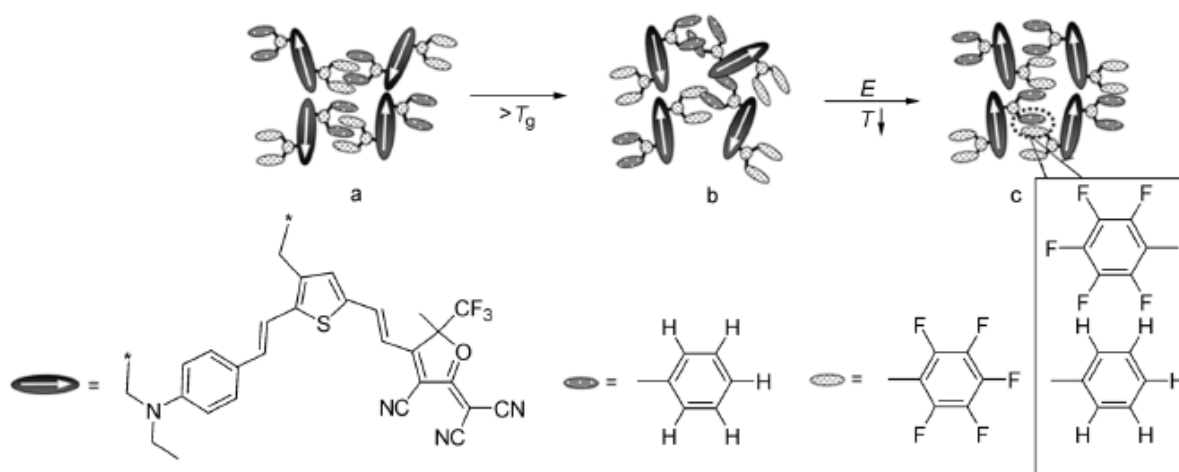

**Fig. S8** Graphical illustration of the alignment formation of self-assembled chromophore **3** by Ar-ArF interactions: (a) locked random dipoles (shown as arrows) before poling; (b) unlocked random dipoles before poling; (c) locked acentric dipoles after poling followed by cooling.

**Table S1.** The maximum absorption of hyperbranched polymers ( $\lambda_{\max}$ , nm).

|           | THF | 1,4-dioxane | chloroform | dichloromethane | DMF | DMSO |
|-----------|-----|-------------|------------|-----------------|-----|------|
| <b>P1</b> | 454 | 447         | 447        | 449             | 465 | 473  |
| <b>P2</b> | 456 | 446         | 447        | 455             | 468 | 473  |
| <b>P3</b> | 456 | 452         | 454        | 454             | 470 | 475  |
| <b>P4</b> | 453 | 443         | 447        | 448             | 464 | 470  |

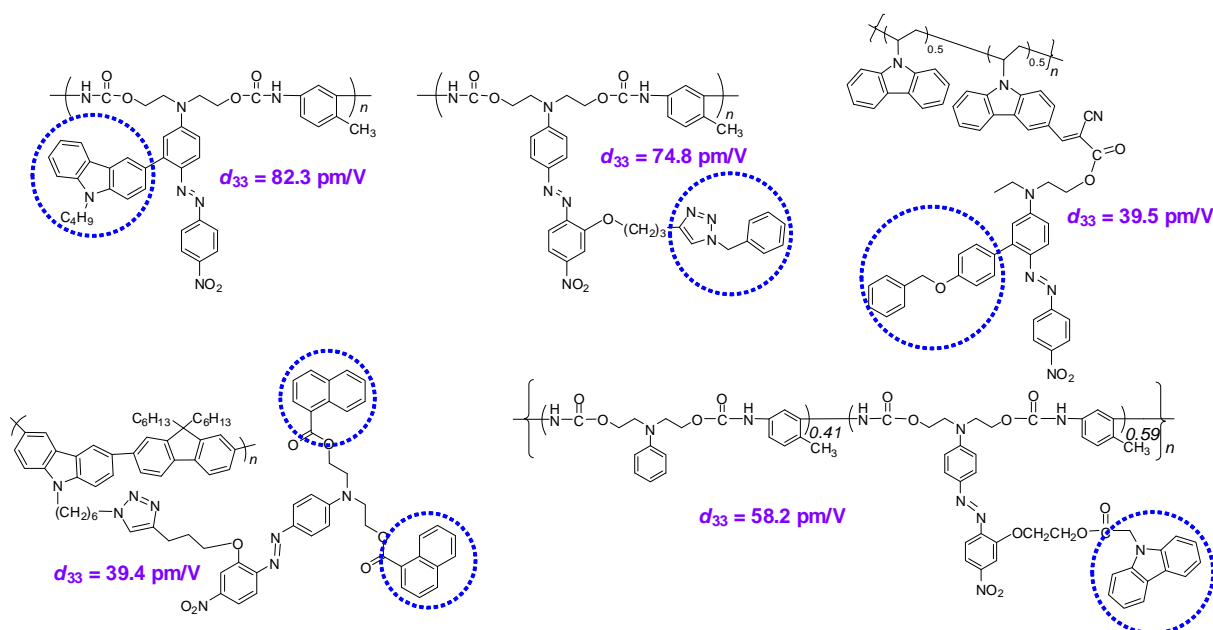

**Chart S4** Some NLO polymers and their  $d_{33}$  values.

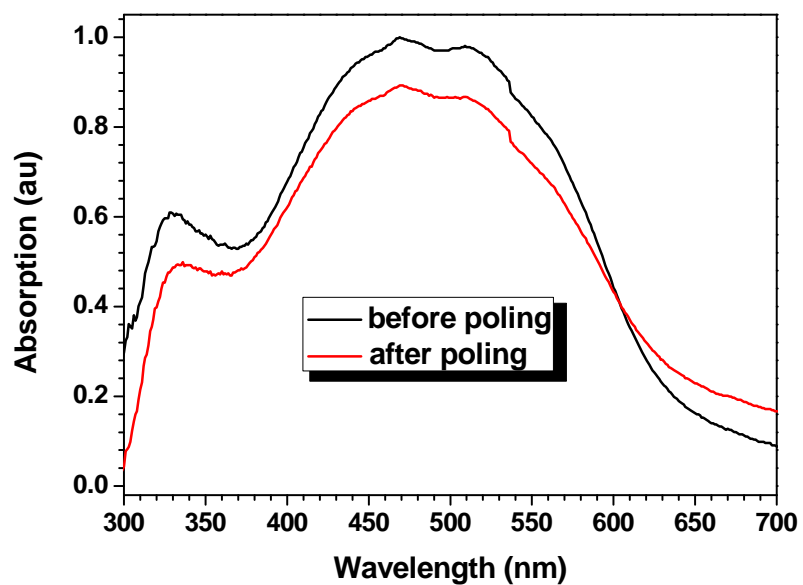

Fig. S9 Absorption spectra of the film of **P3** before and after poling.

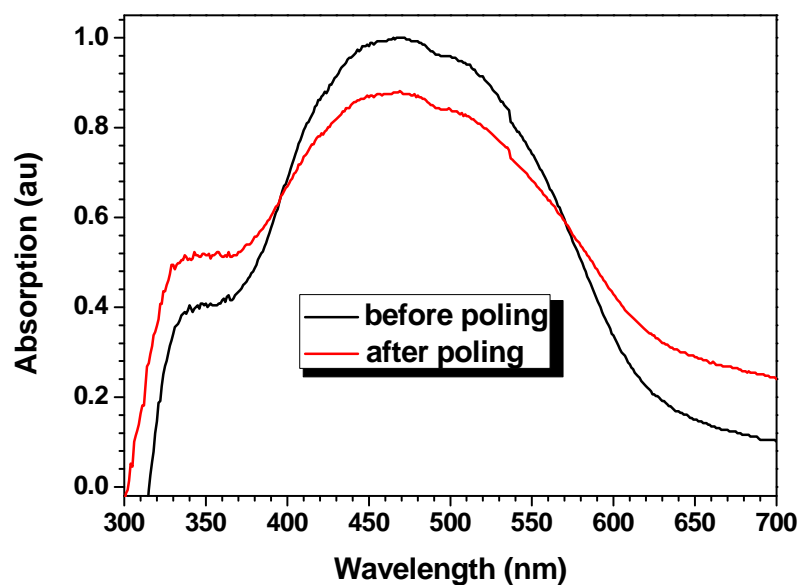

Fig. S10 Absorption spectra of the film of **P4** before and after poling.
